# Supplementary material for: A novel palmitic acid hydroxy stearic acid (5‐PAHSA) plays a neuroprotective role by inhibiting phosphorylation of the m‐TOR‐ULK1 pathway and regulating autophagy
Source: PubMed Central journal article supplement (PMC7941174; doi:10.1111/cns.13573), 2021-01-18
Supplement: CNS-27-484-s002.pdf [file CNS-27-484-s002.pdf]

Full unedited gel/blot for Figure 3A

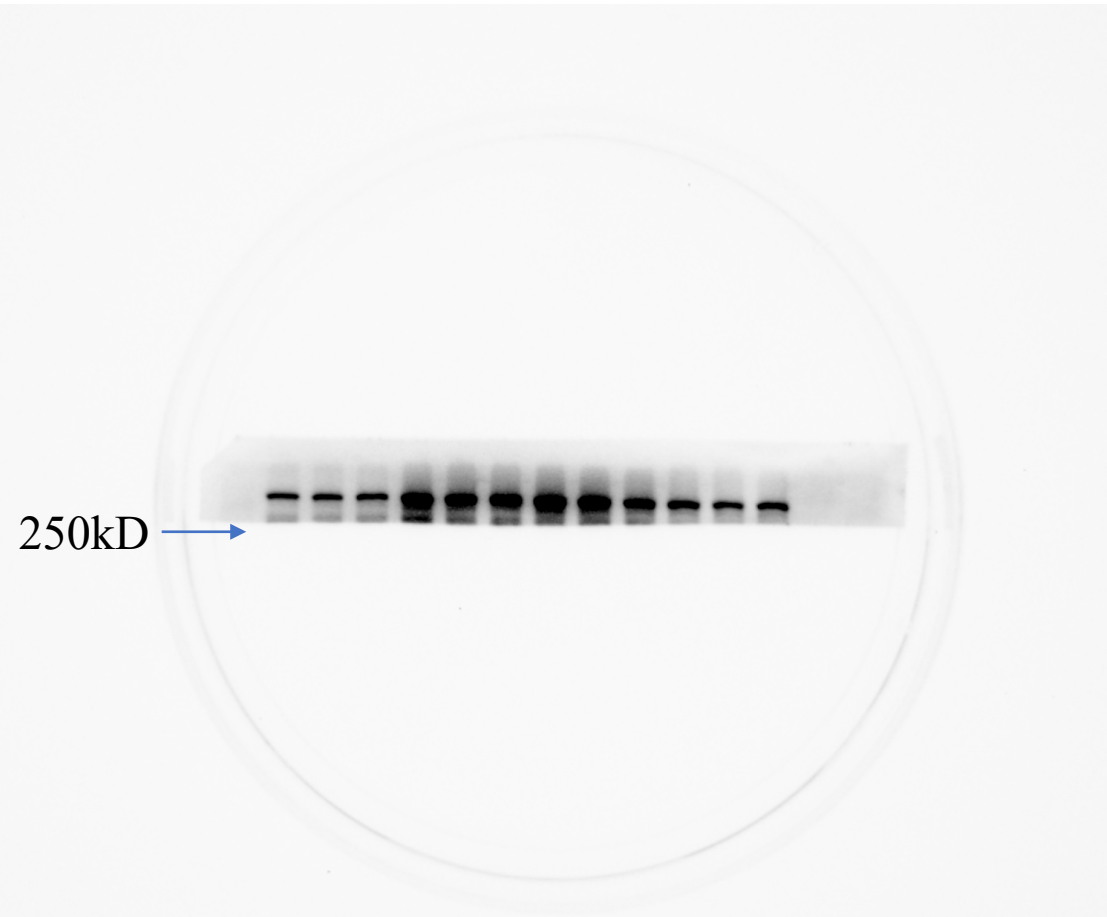

P-mTOR Ser 2448  
(289kD)

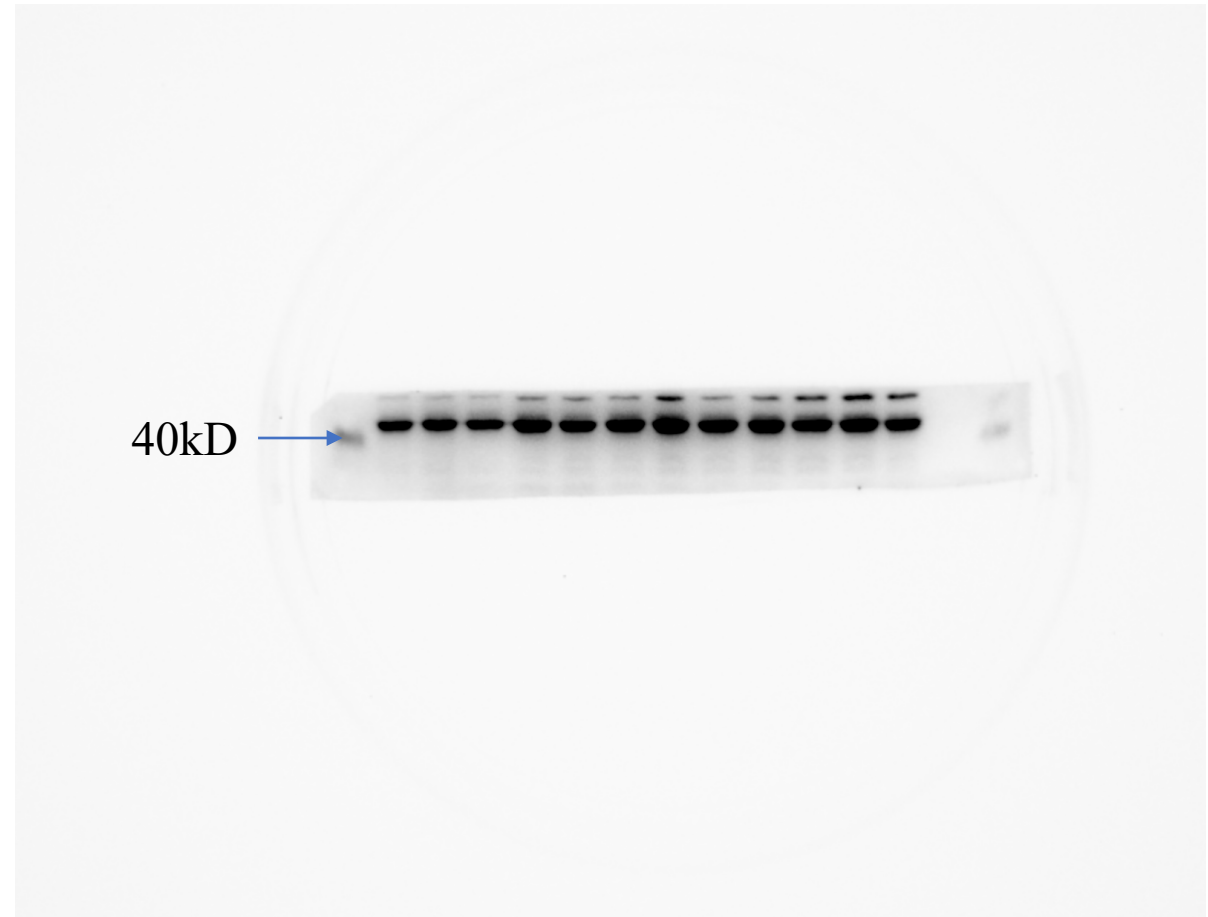

$\beta$ -actin  
(43kD)

Full unedited gel/blot for Figure 3B

150kD →

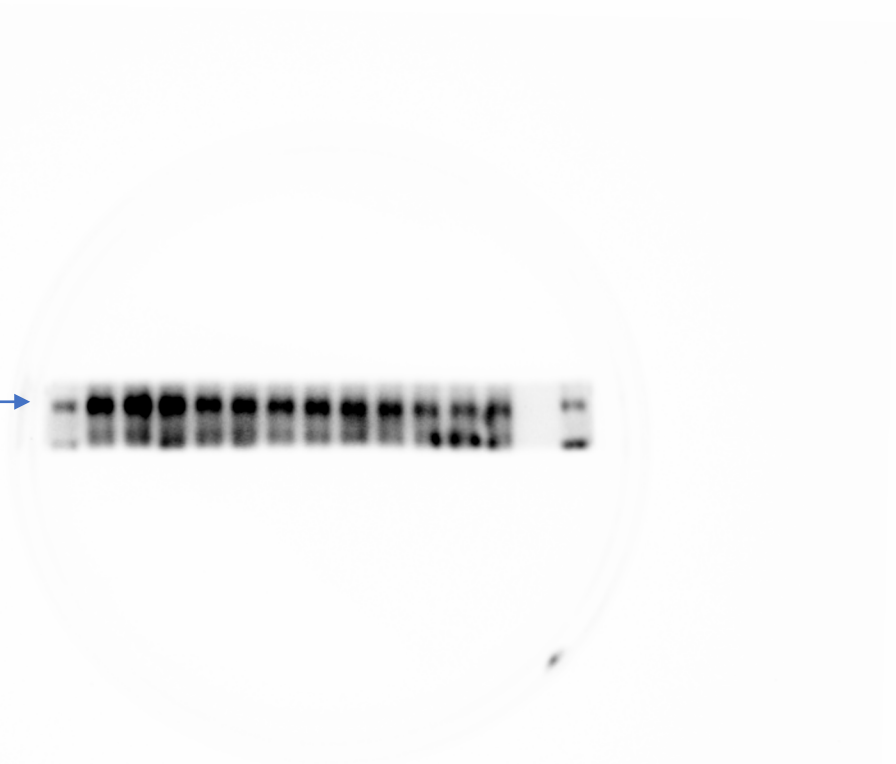A Western blot image showing a single row of approximately 12 lanes. Each lane contains a dark, horizontal band of protein. The bands are all at a similar vertical position, corresponding to the 150kD marker on the left. The bands vary slightly in intensity and thickness across the lanes.

P-ULK-1 Ser 757  
(150kD)

40kD →

A Western blot image showing a single row of approximately 12 lanes. Each lane contains a dark, horizontal band of protein. The bands are all at a similar vertical position, corresponding to the 40kD marker on the left. The bands are relatively uniform in intensity and thickness across the lanes.

$\beta$ -actin  
(43kD)

Full unedited gel/blot for Figure 3C

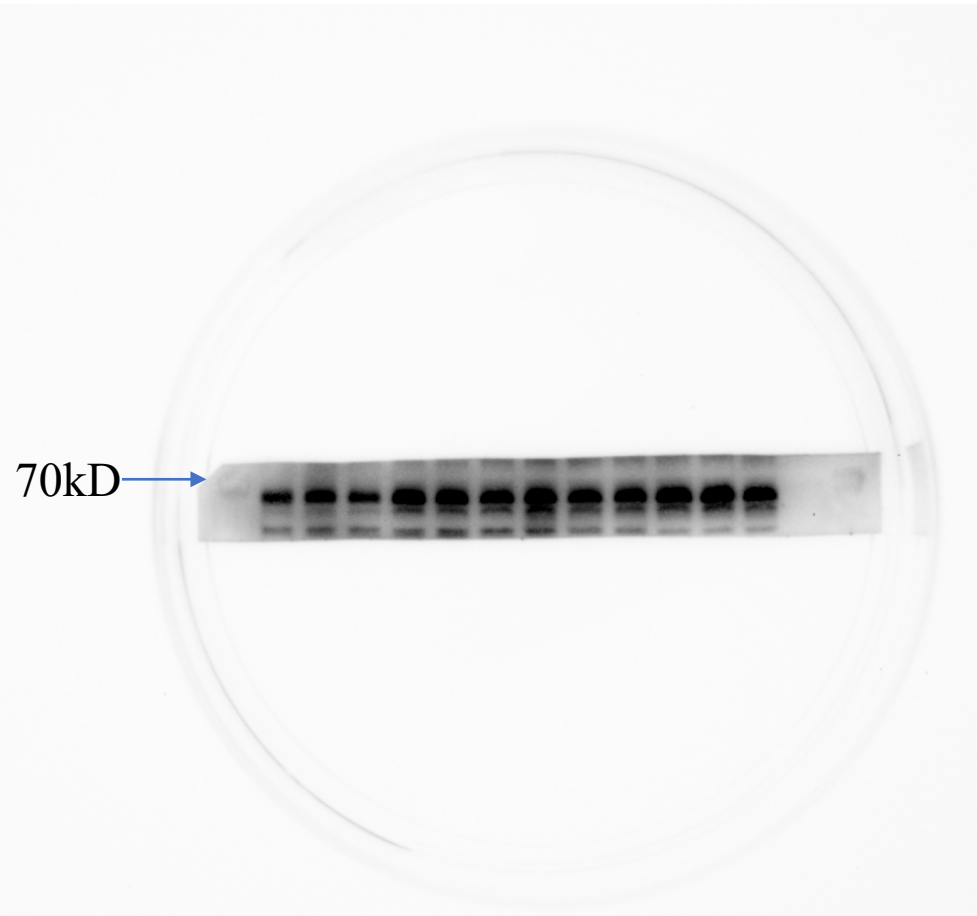

Beclin-1  
(43kD)

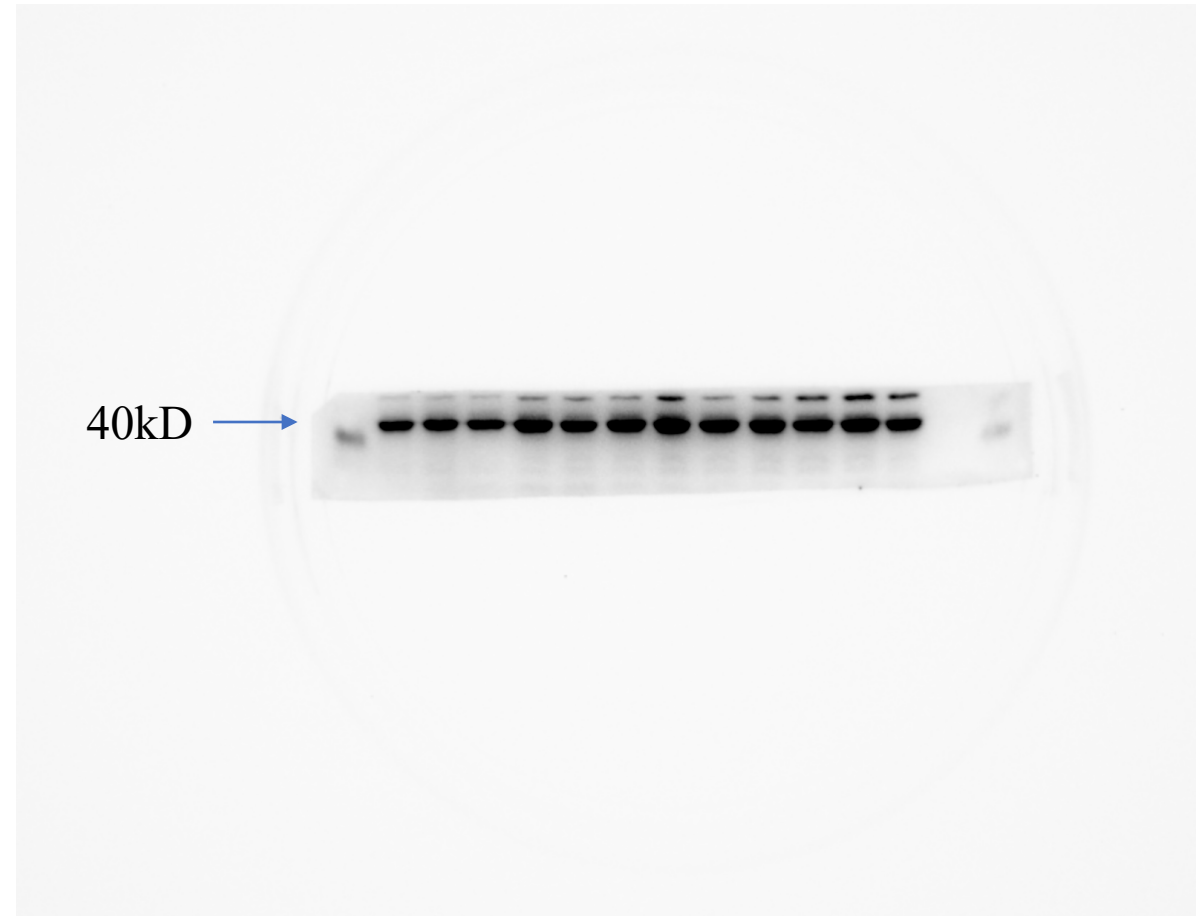

$\beta$ -actin  
(43kD)

Full unedited gel/blot for Figure 3D

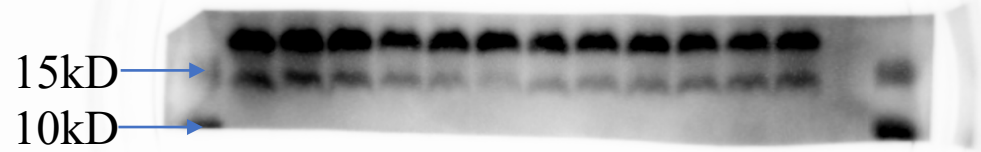

LC3 I (17kD)  
LC3 II(14kD)

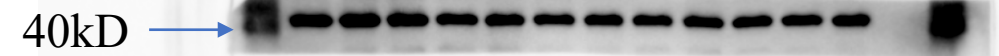

$\beta$ -actin  
(43kD)

Full unedited gel/blot for Figure 3E

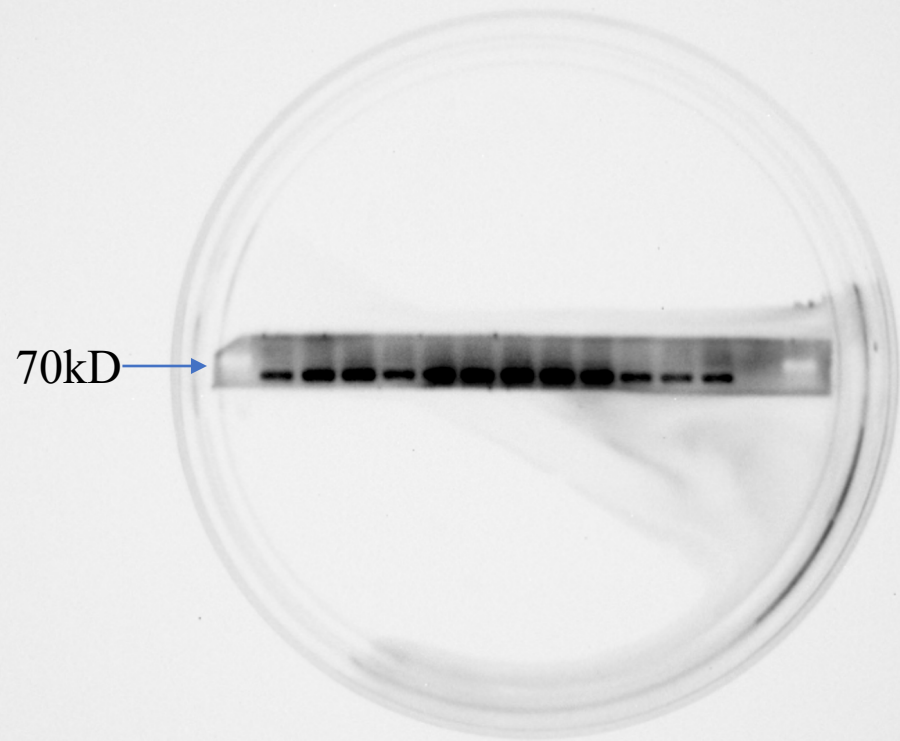

P62/SQSTM1  
(62kD)

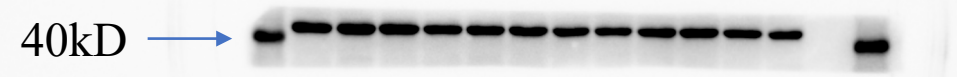

$\beta$ -actin  
(43kD)

Full unedited gel/blot for Figure 3F

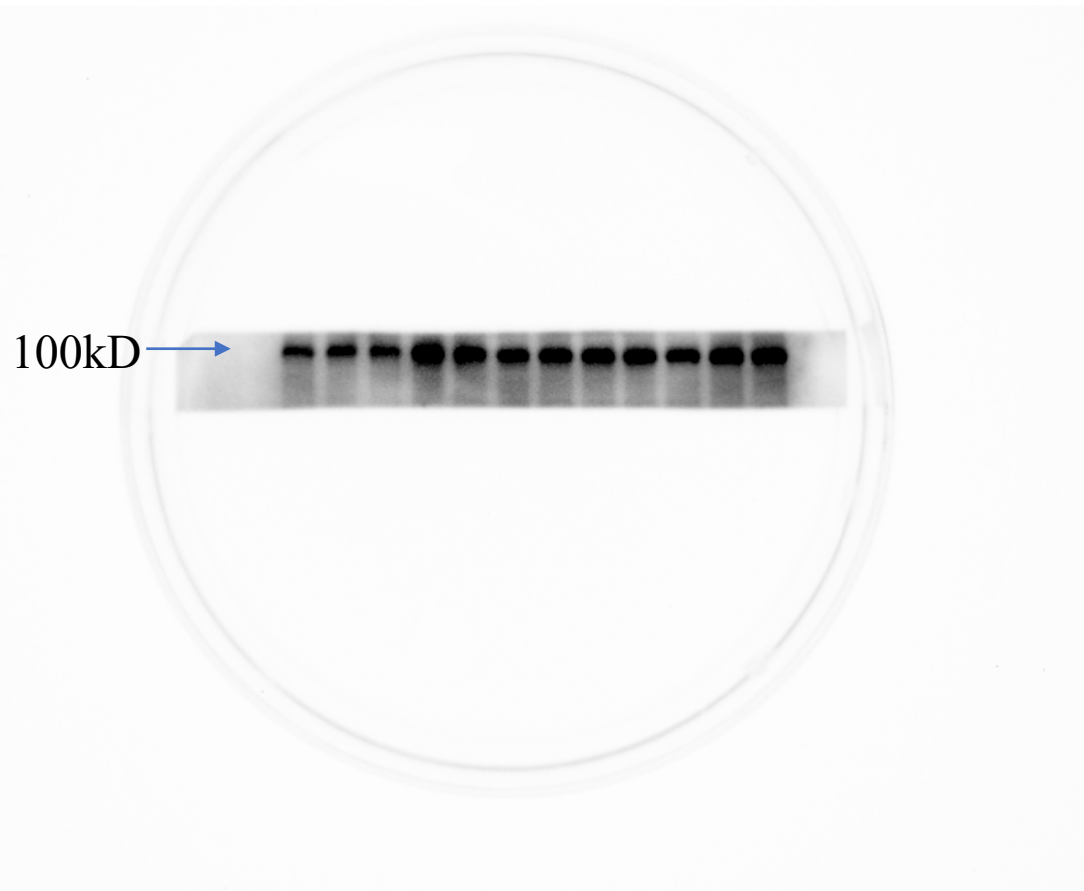

PI3K CIII(100kD)

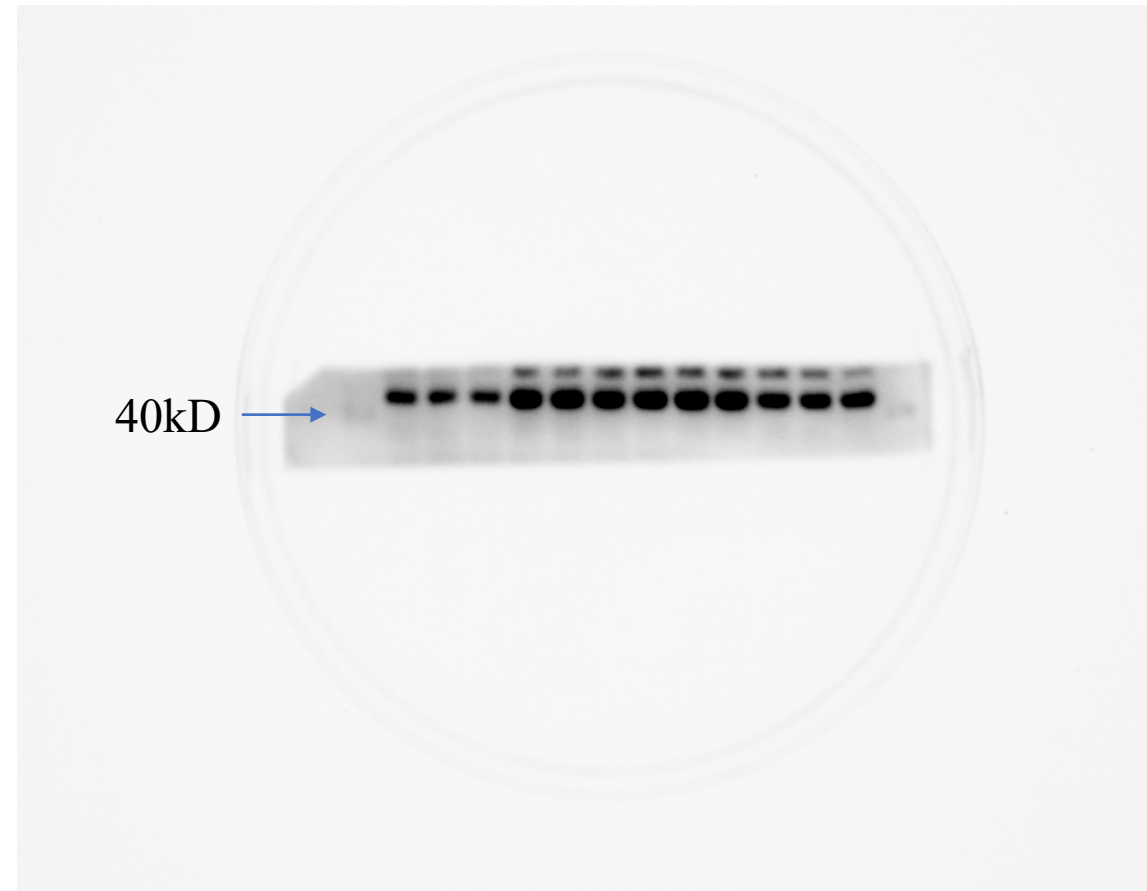

$\beta$ -actin  
(43kD)

Full unedited gel/blot for Figure 4A

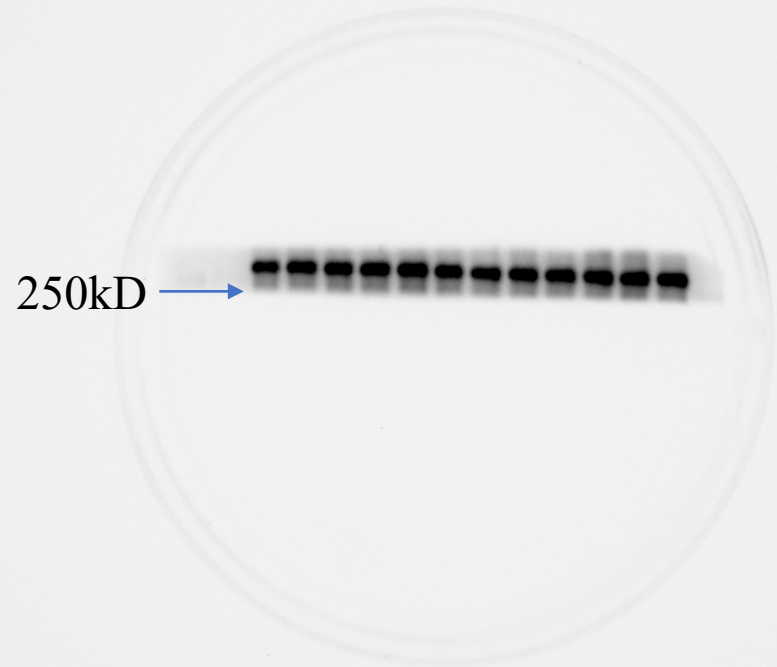

P-mTOR Ser 2448  
(289kD)

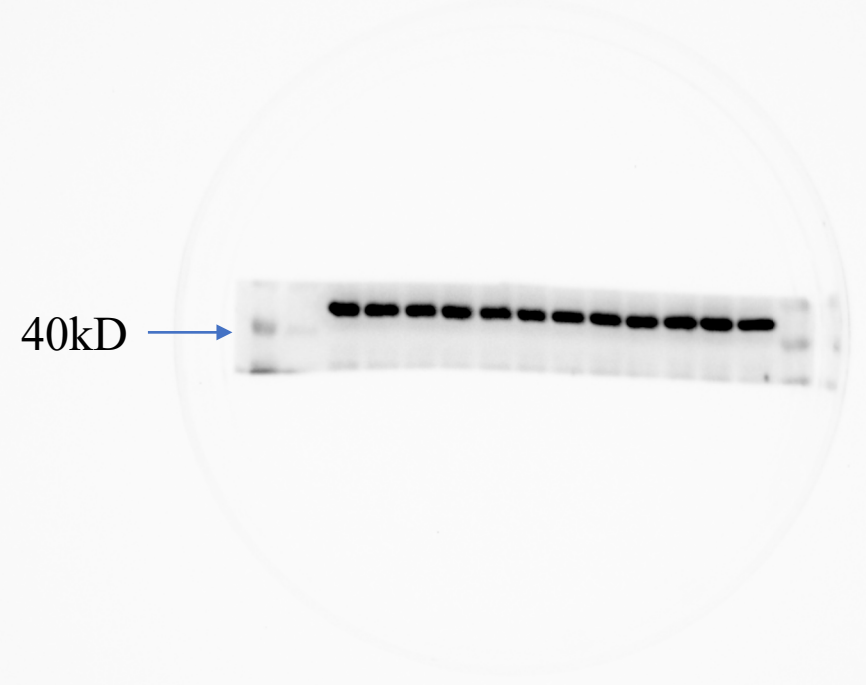

$\beta$ -actin  
(43kD)

Full unedited gel/blot for Figure 4B

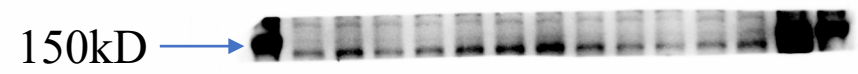

P-ULK-1 Ser 757  
(150kD)

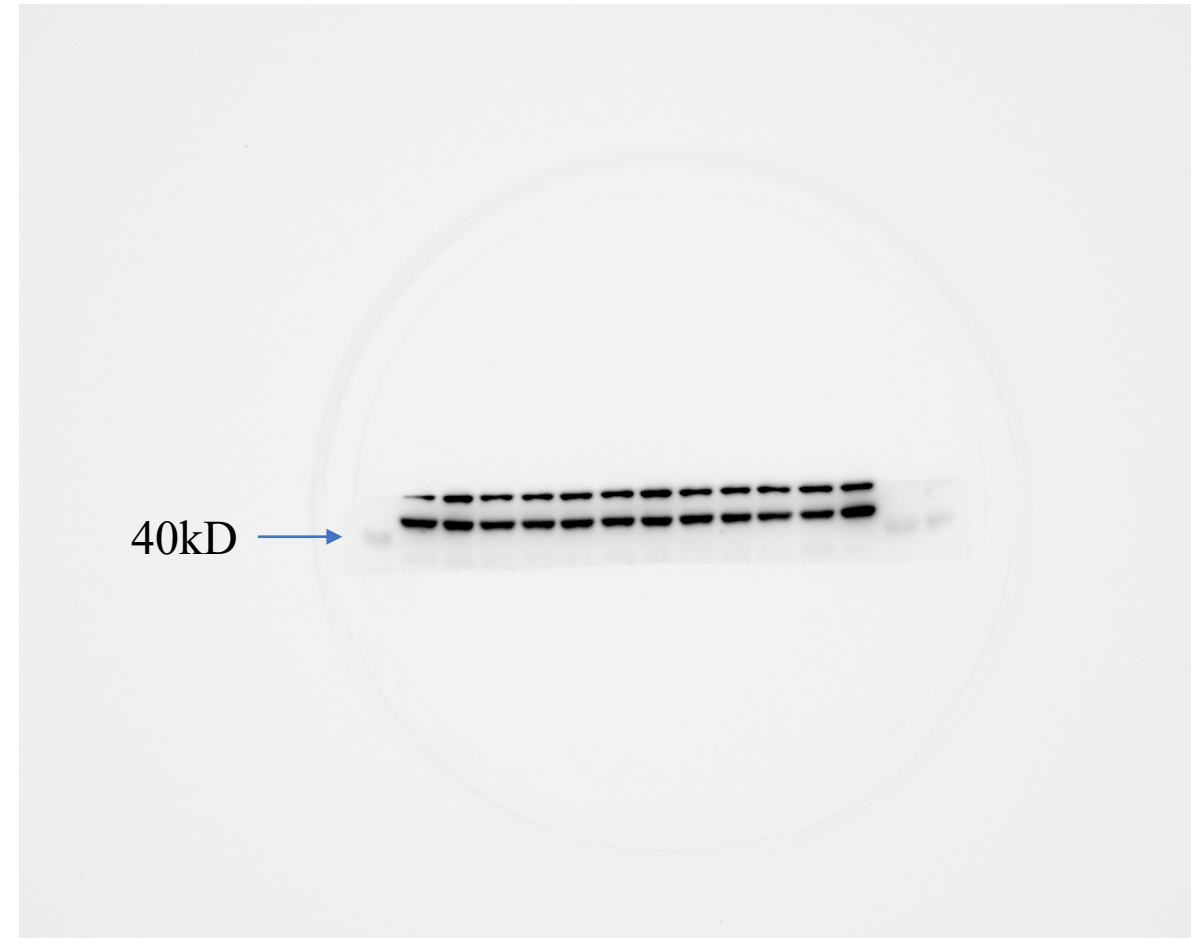

$\beta$ -actin  
(43kD)



Full unedited gel/blot for Figure 4C

70kD →

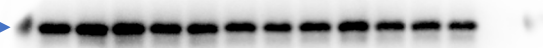

Beclin-1  
(60kD)

40kD →

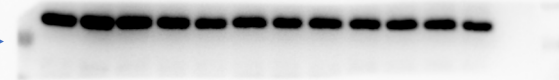

$\beta$ -actin  
(43kD)

Full unedited gel/blot for Figure 4D

15kD →  
10kD →

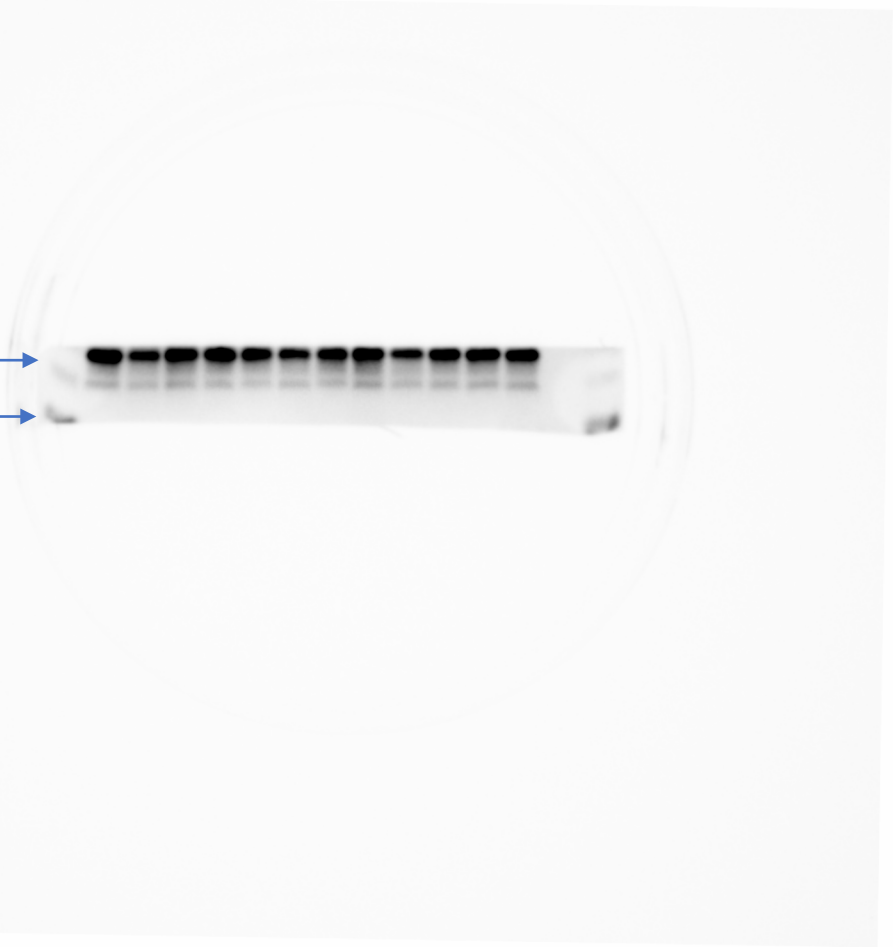

LC3 I (17kD)  
LC3 II (14kD)

40kD →

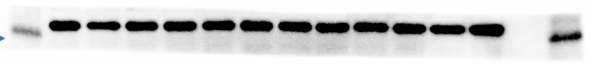

$\beta$ -actin  
(43kD)

Full unedited gel/blot for Figure 4E

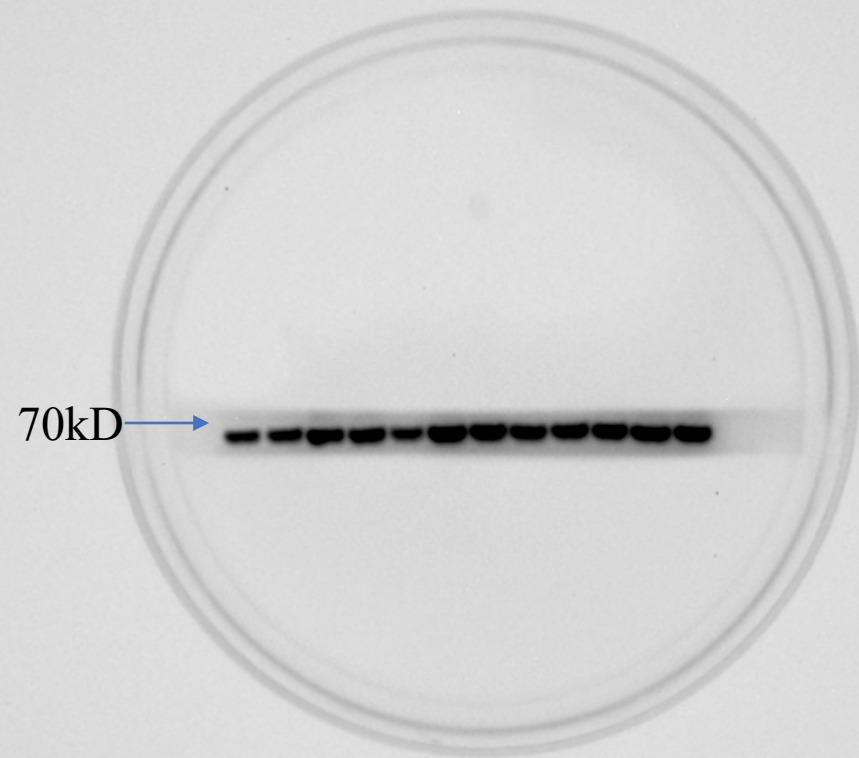

P62/SQSTM1  
(62kD)

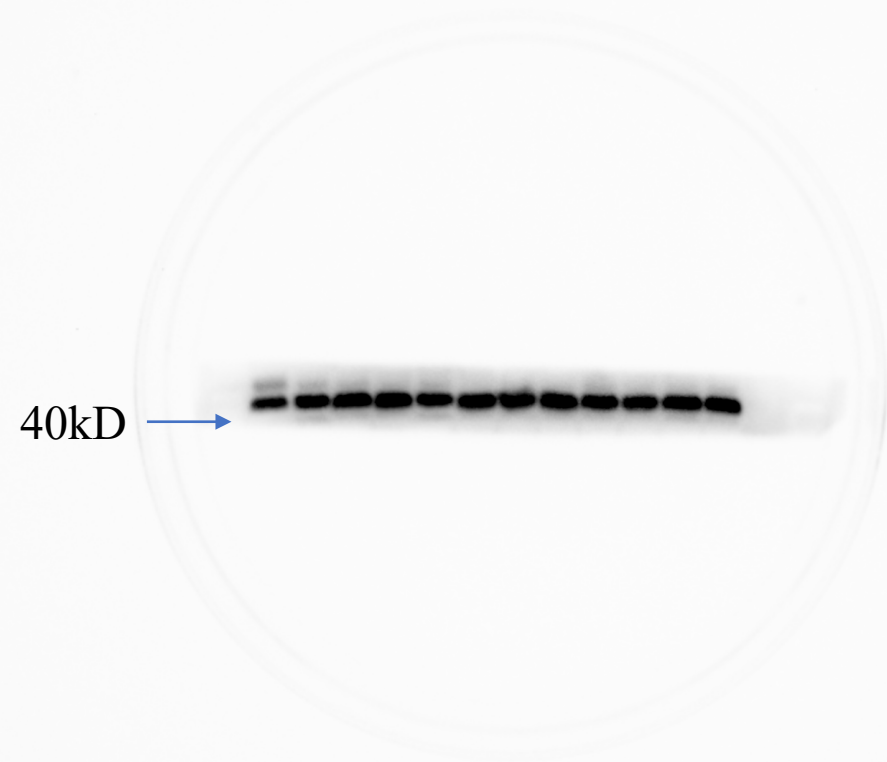

$\beta$ -actin  
(43kD)

Full unedited gel/blot for Figure 4F

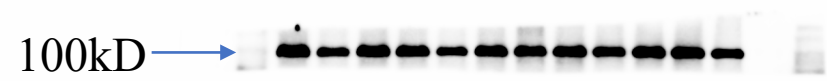

PI3K CIII(100kD)

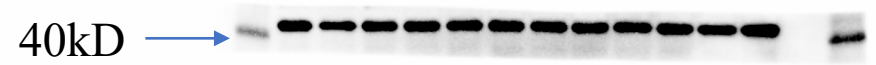

$\beta$ -actin  
(43kD)

Full unedited gel/blot for Figure 5A

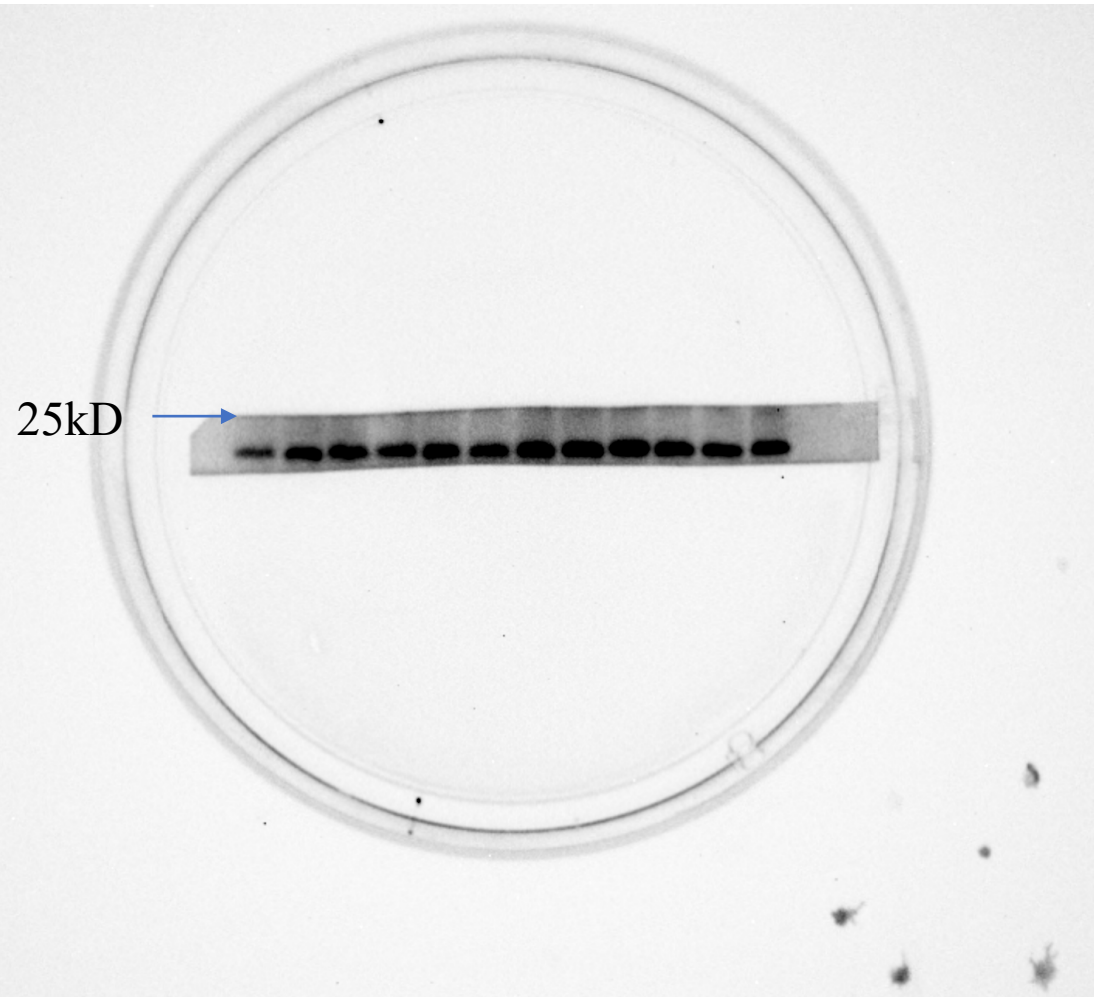

Bax (21kD)

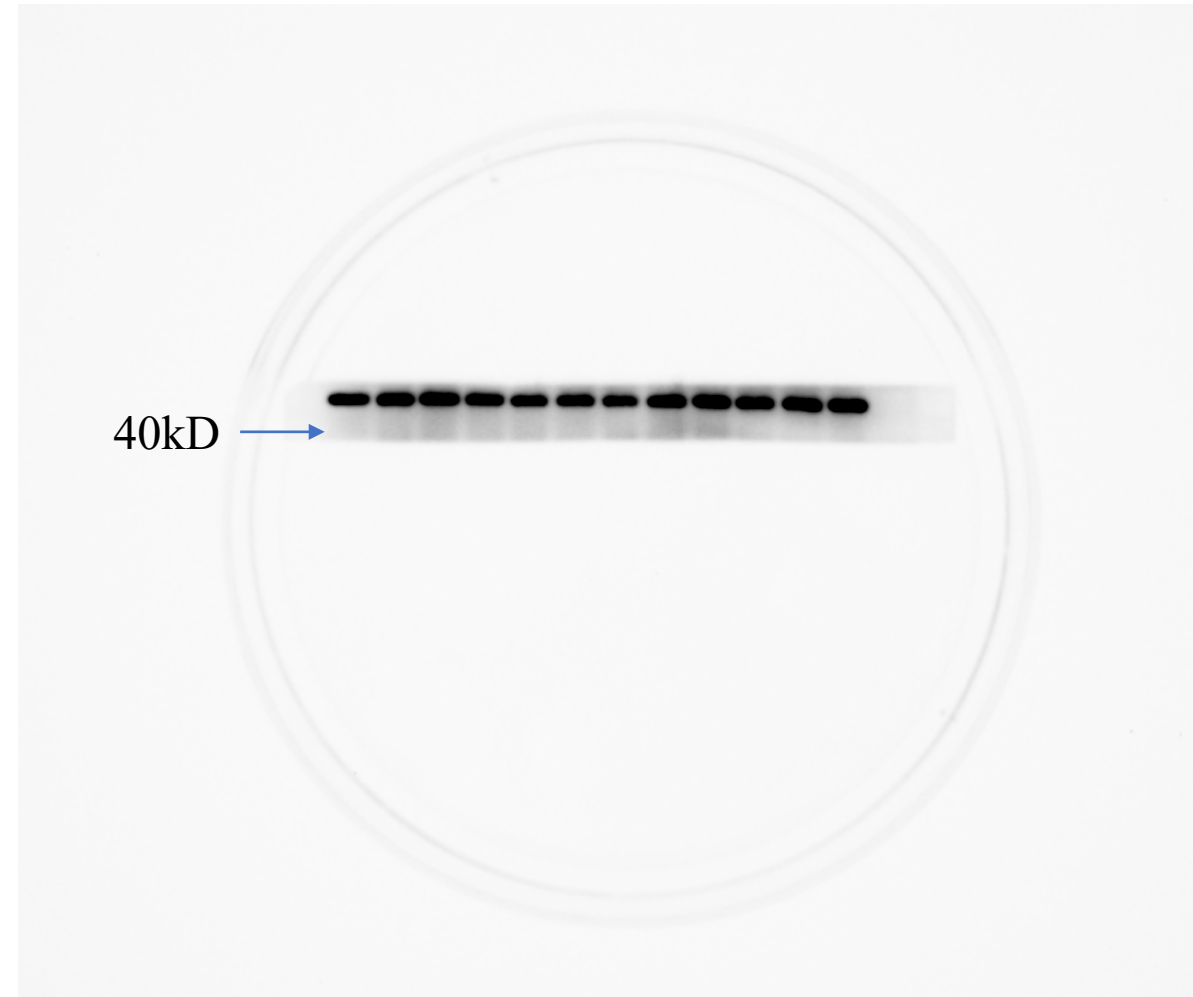

$\beta$ -actin  
(43kD)

Full unedited gel/blot for Figure 5B

15kD →  
10kD →

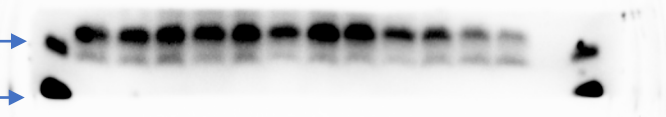

Cleaved caspase-3 (17kD)

40kD →

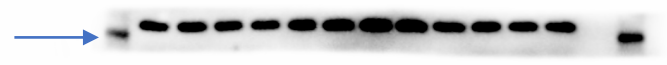

$\beta$ -actin  
(43kD)

Full unedited gel/blot for Figure 5C

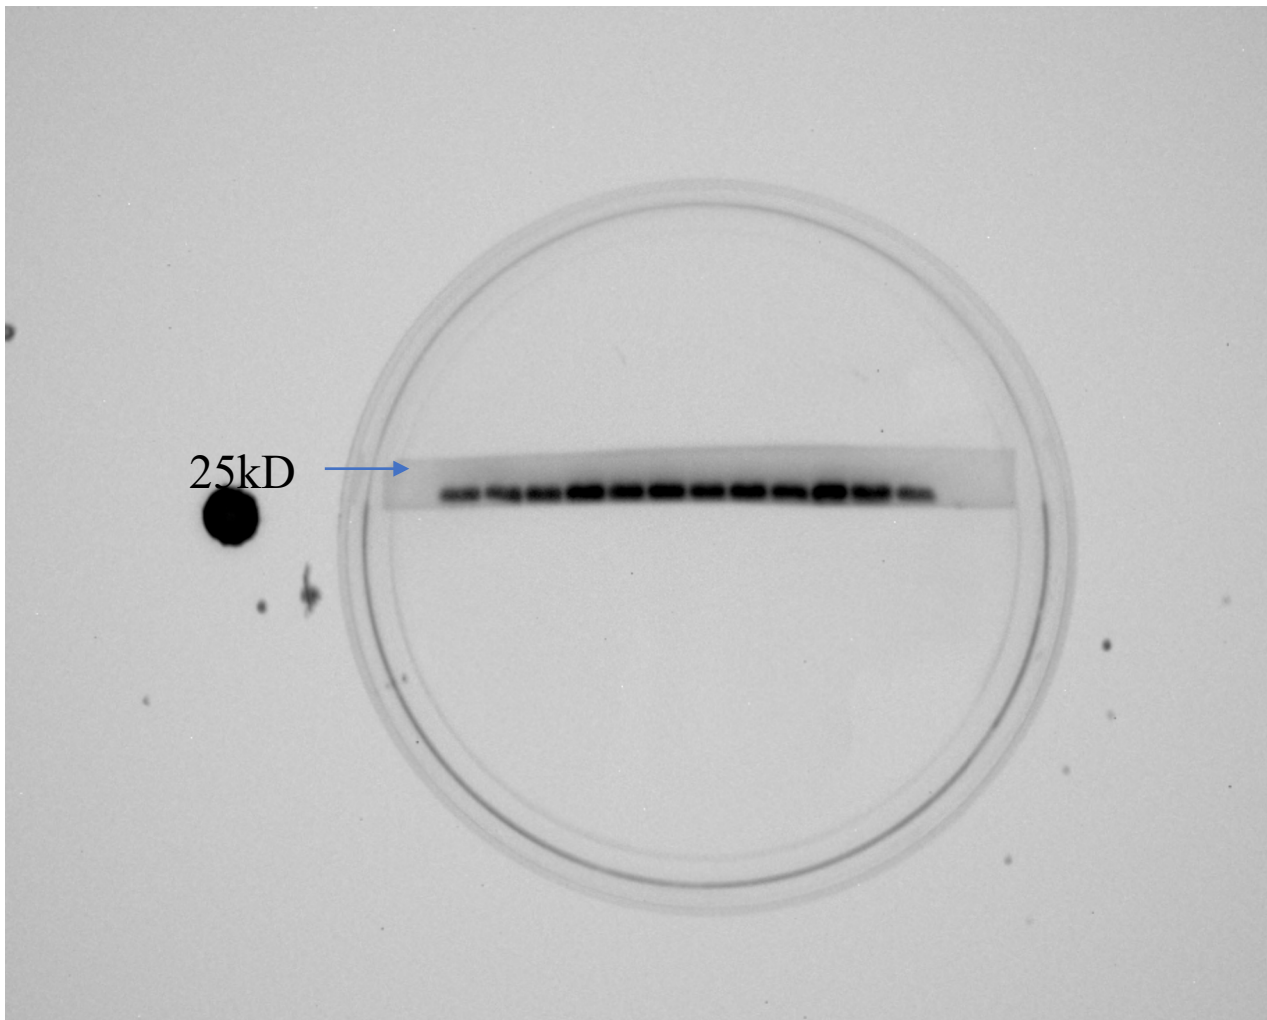

Bax (21kD)

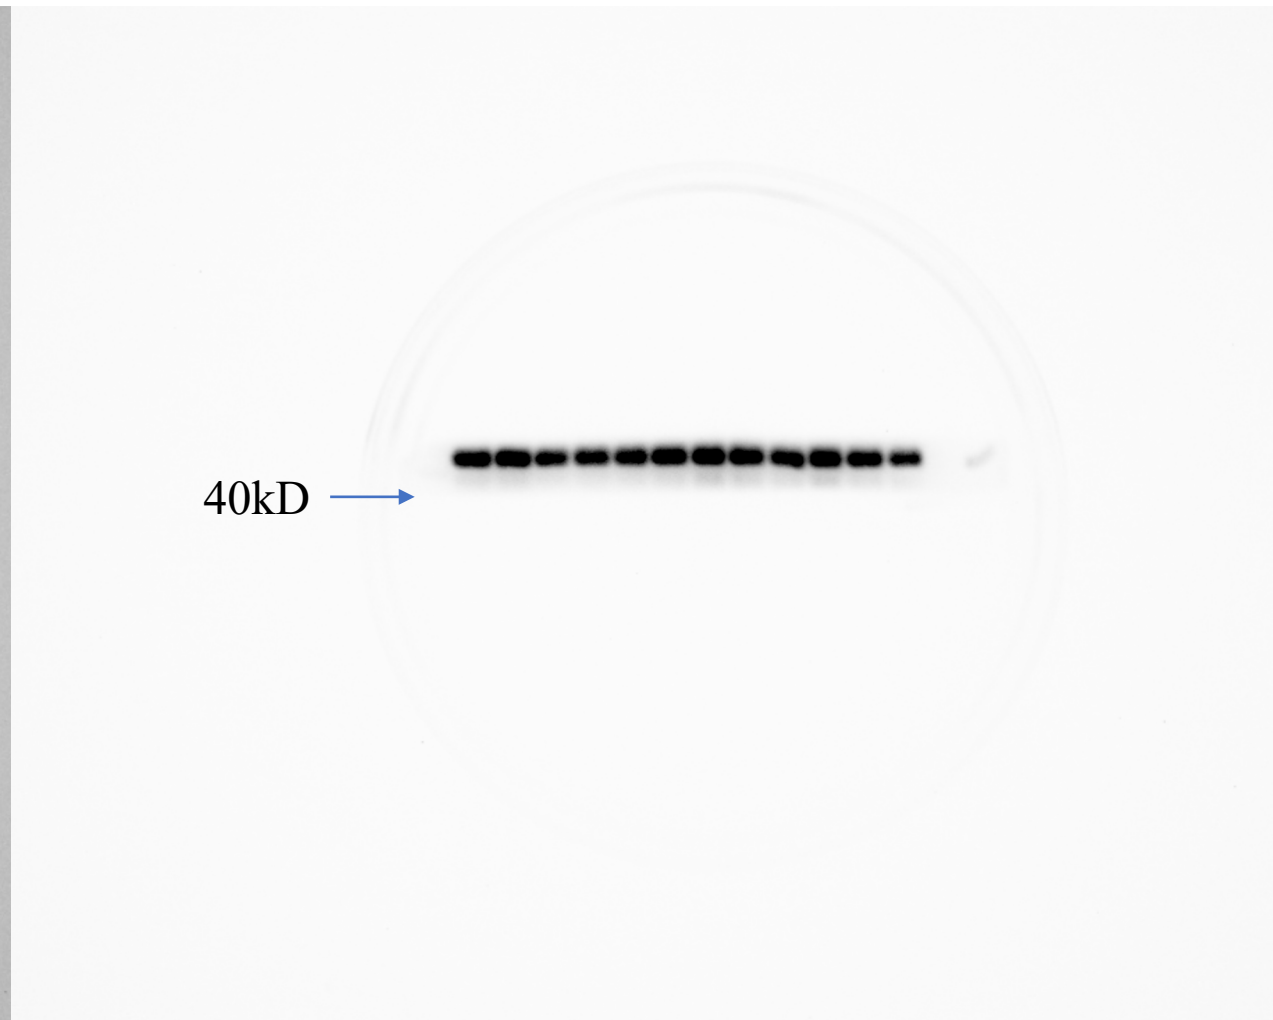

$\beta$ -actin  
(43kD)

Full unedited gel/blot for Figure 5D

15kD →  
10kD →

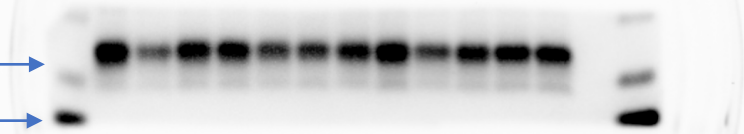

Cleaved caspase-3 (17kD)

40kD →

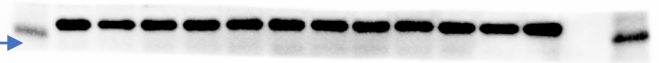

$\beta$ -actin  
(43kD)
