# Supplementary material for: A novel palmitic acid hydroxy stearic acid (5‐PAHSA) plays a neuroprotective role by inhibiting phosphorylation of the m‐TOR‐ULK1 pathway and regulating autophagy
Source: PubMed Central journal article supplement (PMC7941174; doi:10.1111/cns.13573), 2021-01-18
Supplement: CNS-27-484-s003.pdf [file CNS-27-484-s003.pdf]

## FBG C57

BEFORE

| ANOVA table                 | SS     | DF | MS     | F (DFn, DF P value)  |
|-----------------------------|--------|----|--------|----------------------|
| Treatment (between columns) | 0.6758 | 2  | 0.3379 | F (2, 21) = P=0.3166 |
| Residual (within columns)   | 5.838  | 21 | 0.278  |                      |
| Total                       | 6.513  | 23 |        |                      |

10 DAYS

| ANOVA table                 | SS     | DF | MS     | F (DFn, DF P value)  |
|-----------------------------|--------|----|--------|----------------------|
| Treatment (between columns) | 0.9744 | 2  | 0.4872 | F (2, 15) = P=0.7181 |
| Residual (within columns)   | 21.58  | 15 | 1.439  |                      |
| Total                       | 22.56  | 17 |        |                      |

30 DAYS

| ANOVA table                 | SS     | DF | MS     | F (DFn, DF P value)  |
|-----------------------------|--------|----|--------|----------------------|
| Treatment (between columns) | 0.6744 | 2  | 0.3372 | F (2, 15) = P=0.0818 |
| Residual (within columns)   | 1.702  | 15 | 0.1134 |                      |
| Total                       | 2.376  | 17 |        |                      |

## FBG DB/DB

BEFORE

| ANOVA table                 | SS    | DF | MS    | F (DFn, DF P value)  |
|-----------------------------|-------|----|-------|----------------------|
| Treatment (between columns) | 2.175 | 2  | 1.088 | F (2, 18) = P=0.4407 |
| Residual (within columns)   | 22.82 | 18 | 1.268 |                      |
| Total                       | 25    | 20 |       |                      |

10 DAYS

| ANOVA table                 | SS    | DF | MS     | F (DFn, DF P value)  |
|-----------------------------|-------|----|--------|----------------------|
| Treatment (between columns) | 6.98  | 2  | 3.49   | F (2, 18) = P=0.0411 |
| Residual (within columns)   | 16.39 | 18 | 0.9106 |                      |
| Total                       | 23.37 | 20 |        |                      |

**No difference in multiple comparison with control**

30 DAYS

| ANOVA table                 | SS    | DF | MS     | F (DFn, DF P value)  |
|-----------------------------|-------|----|--------|----------------------|
| Treatment (between columns) | 1.755 | 2  | 0.8776 | F (2, 18) = P=0.4694 |
| Residual (within columns)   | 20.02 | 18 | 1.112  |                      |
| Total                       | 21.78 | 20 |        |                      |

## INSULIN

C57

| ANOVA table                 | SS    | DF | MS    | F (DFn, DF P value)  |
|-----------------------------|-------|----|-------|----------------------|
| Treatment (between columns) | 7.328 | 2  | 3.664 | F (2, 18) = P=0.6194 |
| Residual (within columns)   | 134.1 | 18 | 7.449 |                      |
| Total                       | 141.4 | 20 |       |                      |

DB/DB

| ANOVA table                 | SS    | DF | MS    | F (DFn, DF P value)  |
|-----------------------------|-------|----|-------|----------------------|
| Treatment (between columns) | 9.658 | 2  | 4.829 | F (2, 17) = P=0.2787 |
| Residual (within columns)   | 59.54 | 17 | 3.502 |                      |
| Total                       | 69.2  | 19 |       |                      |

## OGTT (min)

-30

| ANOVA table | SS | DF | MS | F (DFn, DF P value) |
|-------------|----|----|----|---------------------|
|-------------|----|----|----|---------------------|

|                             |        |    |        |                      |
|-----------------------------|--------|----|--------|----------------------|
| Treatment (between columns) | 0.7916 | 2  | 0.3958 | F (2, 17) = P=0.6741 |
| Residual (within columns)   | 16.67  | 17 | 0.9806 |                      |
| Total                       | 17.46  | 19 |        |                      |

0  
kruskal-wallis

30

|                             |       |    |       |                      |
|-----------------------------|-------|----|-------|----------------------|
| ANOVA table                 | SS    | DF | MS    | F (DFn, DF P value)  |
| Treatment (between columns) | 26.38 | 2  | 13.19 | F (2, 16) = P=0.0652 |
| Residual (within columns)   | 64.84 | 16 | 4.053 |                      |

60

|                             |       |    |       |                      |
|-----------------------------|-------|----|-------|----------------------|
| Total                       | 91.23 | 18 |       |                      |
| ANOVA table                 | SS    | DF | MS    | F (DFn, DF P value)  |
| Treatment (between columns) | 13.33 | 2  | 6.666 | F (2, 16) = P=0.0594 |
| Residual (within columns)   | 31.5  | 16 | 1.968 |                      |
| Total                       | 44.83 | 18 |       |                      |

90

|                             |       |    |       |                      |
|-----------------------------|-------|----|-------|----------------------|
| ANOVA table                 | SS    | DF | MS    | F (DFn, DF P value)  |
| Treatment (between columns) | 13.38 | 2  | 6.688 | F (2, 16) = P=0.0687 |
| Residual (within columns)   | 33.65 | 16 | 2.103 |                      |
| Total                       | 47.03 | 18 |       |                      |

120

|                             |       |    |       |                      |
|-----------------------------|-------|----|-------|----------------------|
| ANOVA table                 | SS    | DF | MS    | F (DFn, DF P value)  |
| Treatment (between columns) | 7.634 | 2  | 3.817 | F (2, 16) = P=0.1664 |
| Residual (within columns)   | 30.38 | 16 | 1.899 |                      |
| Total                       | 38.02 | 18 |       |                      |

## ox-LDL

C57

|                             |       |    |       |                      |
|-----------------------------|-------|----|-------|----------------------|
| ANOVA table                 | SS    | DF | MS    | F (DFn, DF P value)  |
| Treatment (between columns) | 7.328 | 2  | 3.664 | F (2, 18) = P=0.6194 |
| Residual (within columns)   | 134.1 | 18 | 7.449 |                      |
| Total                       | 141.4 | 20 |       |                      |

DB/DB

|                             |       |    |       |                      |
|-----------------------------|-------|----|-------|----------------------|
| ANOVA table                 | SS    | DF | MS    | F (DFn, DF P value)  |
| Treatment (between columns) | 9.658 | 2  | 4.829 | F (2, 17) = P=0.2787 |
| Residual (within columns)   | 59.54 | 17 | 3.502 |                      |
| Total                       | 69.2  | 19 |       |                      |

## Y-MAZE

C57

|                             |         |    |          |                      |
|-----------------------------|---------|----|----------|----------------------|
| ANOVA table                 | SS      | DF | MS       | F (DFn, DF P value)  |
| Treatment (between columns) | 0.03582 | 2  | 0.01791  | F (2, 17) = P=0.1817 |
| Residual (within columns)   | 0.1612  | 17 | 0.009483 |                      |
| Total                       | 0.197   | 19 |          |                      |

DB/DB

|                             |          |    |          |                      |
|-----------------------------|----------|----|----------|----------------------|
| ANOVA table                 | SS       | DF | MS       | F (DFn, DF P value)  |
| Treatment (between columns) | 0.002628 | 2  | 0.001314 | F (2, 18) = P=0.9231 |
| Residual (within columns)   | 0.2942   | 18 | 0.01634  |                      |
| Total                       | 0.2968   | 20 |          |                      |

## CRP

C57

| ANOVA table                 | SS    | DF | MS   | F (DFn, DF) P value  |
|-----------------------------|-------|----|------|----------------------|
| Treatment (between columns) | 2368  | 2  | 1184 | F (2, 22) = P=0.4049 |
| Residual (within columns)   | 27649 | 22 | 1257 |                      |
| Total                       | 30017 | 24 |      |                      |

DB/DB

kruskal-wallis

## IL-1A

C57

kruskal-wallis

DB/DB

| ANOVA table                 | SS    | DF | MS    | F (DFn, DF) P value  |
|-----------------------------|-------|----|-------|----------------------|
| Treatment (between columns) | 3344  | 2  | 1672  | F (2, 21) = P=0.0250 |
| Residual (within columns)   | 7946  | 21 | 378.4 |                      |
| Total                       | 11291 | 23 |       |                      |

## TNF-A

C57

| ANOVA table                 | SS     | DF | MS    | F (DFn, DF) P value  |
|-----------------------------|--------|----|-------|----------------------|
| Treatment (between columns) | 63635  | 2  | 31817 | F (2, 19) = P=0.0715 |
| Residual (within columns)   | 198811 | 19 | 10464 |                      |
| Total                       | 262446 | 21 |       |                      |

DB/DB

kruskal-wallis
